# Supplementary material for: Associations Between Subjective Tinnitus and Cognitive Performance: Systematic Review and Meta-Analyses
Source: PubMed Central journal article supplement (PMC7243410; doi:10.1177/2331216520918416), 2020-05-21
Supplement: sj-pdf-2-tia-10.1177_2331216520918416.pdf [file sj-pdf-2-tia-10.1177_2331216520918416.pdf]

## Search activity

| My research question:             | Is subjective tinnitus associated with cognitive performance?                                                                                                   |                                                                                                                                                                                                                                            |                               |                          |
|-----------------------------------|-----------------------------------------------------------------------------------------------------------------------------------------------------------------|--------------------------------------------------------------------------------------------------------------------------------------------------------------------------------------------------------------------------------------------|-------------------------------|--------------------------|
| Places to search for information: | PubMed; B. Ovid MEDLINE; C. Ovid EMBASE; D. PsycINFO; E. ASSIA; F. EBSCO; G. CINAHAL; H. Scopus; I. Web of Science (Science and Social Science Citation Index). |                                                                                                                                                                                                                                            |                               |                          |
|                                   |                                                                                                                                                                 |                                                                                                                                                                                                                                            |                               |                          |
| List of sources searched:         | Date of search                                                                                                                                                  | Search strategy used, including any limits                                                                                                                                                                                                 | Total number of results found | Comments                 |
| PubMed                            | 14/02/18                                                                                                                                                        | (“tinnitus”[MeSH] OR<br>“tinnitus”[tiab] OR<br>“phantom sound*”[tiab]<br>OR “ringing”[tiab] OR<br>“buzzing”[tiab]) AND<br>(“cognition”[MeSH] OR<br>“cogniti*”[tiab] OR<br>“memory”[tiab] or<br>“attention*”[tiab] OR<br>“executive”[tiab]) | 409                           | Limited to human studies |
| PsycINFO (OVID SP)                | 14/02/18                                                                                                                                                        | S1: exp TINNITUS/ or phantom<br>sound*.ab. or ringing.ab. or<br>buzzing.ab. or phantom<br>sound*.ti. or ringing.ti. or<br>buzzing.ti.<br><br>S2: exp COGNITION/ or<br>cogniti*.ab. or memory.ab. or<br>attention*.ab. or executive*.ab. or | 336                           |                          |

|                                |          |                                                                                                                                                                                                                                                                                                              |                                    |                                                                                                                                                                                                                                                                                                                                                                                                                                                                                                                                                                                            |
|--------------------------------|----------|--------------------------------------------------------------------------------------------------------------------------------------------------------------------------------------------------------------------------------------------------------------------------------------------------------------|------------------------------------|--------------------------------------------------------------------------------------------------------------------------------------------------------------------------------------------------------------------------------------------------------------------------------------------------------------------------------------------------------------------------------------------------------------------------------------------------------------------------------------------------------------------------------------------------------------------------------------------|
|                                |          | cogniti*.ti. or memory.ti. or<br>attention*.ti. or executive*.ti.                                                                                                                                                                                                                                            |                                    |                                                                                                                                                                                                                                                                                                                                                                                                                                                                                                                                                                                            |
| Embase (OVID SP)               | 15/02/18 | <p><b>S1:</b> exp TINNITUS/ or phantom sound*.ab. or ringing.ab. or buzzing.ab. or phantom sound*.ti. or ringing.ti. or buzzing.ti.</p> <p><b>S2:</b> exp COGNITION/ or cogniti*.ab. or memory.ab. or attention*.ab. or executive*.ab. or cogniti*.ti. or memory.ti. or attention*.ti. or executive*.ti.</p> | 2730<br><br>With MedLine excluded: | <p>Embase includes Medline records from 1996 onwards. However if you have already searched PubMed, you may wish to exclude Medline results from your search in Embase</p> <p>To limit your search to records unique to Embase add the following limit to your search</p> <p><b>AND [embase]/lim</b></p> <p><b>This will include records for articles indexed by BOTH Embase and Medline, but exclude articles indexed only for Medline</b></p> <p><b>NOT [medline]/lim</b></p> <p><b>This will exclude ALL Medline records (including articles indexed by BOTH Embase and Medline)</b></p> |
| Medline 1946-current (OVID SP) | 14/02/18 | <p><b>S1:</b> exp TINNITUS/ or phantom sound*.ab. or ringing.ab. or buzzing.ab. or phantom sound*.ti. or ringing.ti. or buzzing.ti.</p> <p><b>S2:</b> exp COGNITION/ or cogniti*.ab. or memory.ab. or attention*.ab. or executive*.ab. or</p>                                                                | 492                                |                                                                                                                                                                                                                                                                                                                                                                                                                                                                                                                                                                                            |

|                                |          |                                                                                                                                                                                                                                                                                                                                                                                                                      |                                                                                                                          |  |
|--------------------------------|----------|----------------------------------------------------------------------------------------------------------------------------------------------------------------------------------------------------------------------------------------------------------------------------------------------------------------------------------------------------------------------------------------------------------------------|--------------------------------------------------------------------------------------------------------------------------|--|
|                                |          | cogniti*.ti. or memory.ti. or<br>attention*.ti. or executive*.ti.                                                                                                                                                                                                                                                                                                                                                    |                                                                                                                          |  |
| ASSIA (via ProQuest)           | 14/02/18 | (tinnitus OR "phantom<br>sound" OR ringing OR<br>buzzing) AND (cognition<br>OR cogniti* OR memory<br>OR attention* OR<br>executive*)                                                                                                                                                                                                                                                                                 | 582                                                                                                                      |  |
| CINAHL plus (via<br>EBSCOhost) | 14/02/18 | ((MH "Tinnitus") OR<br>tinnitus OR ringing OR<br>phantom sound) AND<br>((MH "Cognition") OR<br>cognition OR cogniti*<br>OR memory OR<br>attention* OR<br>executive*)                                                                                                                                                                                                                                                 | 393                                                                                                                      |  |
| Scopus                         | 15/02/18 | ( TITLE-ABS-<br>KEY ( tinnitus ) OR TITLE-<br>ABS-<br>KEY ( ringing ) OR TITLE-<br>ABS-<br>KEY ( buzzing ) OR TITLE-<br>ABS-KEY ( "phantom<br>sound" ) AND TITLE-ABS-<br>KEY ( cognition ) OR TITLE-<br>ABS-<br>KEY ( cogniti* ) OR TITLE-<br>ABS-<br>KEY ( memory ) OR TITLE-<br>ABS-<br>KEY ( attention* ) OR TITLE-<br>ABS-<br>KEY ( executive ) OR TITLE-<br>ABS-KEY ( training ) ) AND<br>NOT INDEX ( medline ) | 2261<br><br>974 with not MedLine<br><br>Additional limits: English<br>articles and doctype<br>(article or in-press): 458 |  |

|                       |           |                                                                                                                                                                        |     |  |
|-----------------------|-----------|------------------------------------------------------------------------------------------------------------------------------------------------------------------------|-----|--|
| Web of Science (SSCI) | 1/4/02/18 | (TS=tinnitus OR Ts="ringing"<br>OR Ts="buzzing" OR<br>Ts="phantom sound") AND<br>(TS=cognition OR Ts=cogniti*<br>OR Ts=attention* OR<br>Ts=memory OR<br>Ts=executive*) | 329 |  |
|-----------------------|-----------|------------------------------------------------------------------------------------------------------------------------------------------------------------------------|-----|--|
