# Supplementary material for: Associations Between Subjective Tinnitus and Cognitive Performance: Systematic Review and Meta-Analyses
Source: PubMed Central journal article supplement (PMC7243410; doi:10.1177/2331216520918416), 2020-05-21
Supplement: sj-pdf-3-tia-10.1177_2331216520918416.pdf [file sj-pdf-3-tia-10.1177_2331216520918416.pdf]

## Search activity

| My research question:             | Is subjective tinnitus associated with cognitive performance?                                                                                                   |                                                                                                                                                                                                                                            |                               |                                                    |
|-----------------------------------|-----------------------------------------------------------------------------------------------------------------------------------------------------------------|--------------------------------------------------------------------------------------------------------------------------------------------------------------------------------------------------------------------------------------------|-------------------------------|----------------------------------------------------|
| Places to search for information: | PubMed; B. Ovid MEDLINE; C. Ovid EMBASE; D. PsycINFO; E. ASSIA; F. EBSCO; G. CINAHAL; H. Scopus; I. Web of Science (Science and Social Science Citation Index). |                                                                                                                                                                                                                                            |                               |                                                    |
|                                   |                                                                                                                                                                 |                                                                                                                                                                                                                                            |                               |                                                    |
| List of sources searched:         | Date of search                                                                                                                                                  | Search strategy used, including any limits                                                                                                                                                                                                 | Total number of results found | Comments                                           |
| PubMed                            | 25/01/19                                                                                                                                                        | (“tinnitus”[MeSH] OR<br>“tinnitus”[tiab] OR<br>“phantom sound*”[tiab]<br>OR “ringing”[tiab] OR<br>“buzzing”[tiab]) AND<br>(“cognition”[MeSH] OR<br>“cogniti*”[tiab] OR<br>“memory”[tiab] or<br>“attention*”[tiab] OR<br>“executive”[tiab]) | 11                            | Date limited: 01/02/18<br>Limited to human studies |
| PsycINFO (OVID SP)                | 25/01/19                                                                                                                                                        | S1: exp TINNITUS/ or phantom<br>sound*.ab. or ringing.ab. or<br>buzzing.ab. or phantom<br>sound*.ti. or ringing.ti. or<br>buzzing.ti.<br><br>S2: exp COGNITION/ or<br>cogniti*.ab. or memory.ab. or<br>attention*.ab. or executive*.ab. or | 16                            | Limit publication year:<br>2018 to current         |

|                                   |          |                                                                                                                                                                                                                                                                                                                 |                                                           |                                                                                                                                                                                              |
|-----------------------------------|----------|-----------------------------------------------------------------------------------------------------------------------------------------------------------------------------------------------------------------------------------------------------------------------------------------------------------------|-----------------------------------------------------------|----------------------------------------------------------------------------------------------------------------------------------------------------------------------------------------------|
|                                   |          | cogniti*.ti. or memory.ti. or<br>attention*.ti. or executive*.ti.                                                                                                                                                                                                                                               |                                                           |                                                                                                                                                                                              |
| Embase (OVID SP)                  | 25/01/19 | S1: exp TINNITUS/ or phantom<br>sound*.ab. or ringing.ab. or<br>buzzing.ab. or phantom<br>sound*.ti. or ringing.ti. or<br>buzzing.ti.<br><br>S2: exp COGNITION/ or<br>cogniti*.ab. or memory.ab. or<br>attention*.ab. or executive*.ab. or<br>cogniti*.ti. or memory.ti. or<br>attention*.ti. or executive*.ti. | 55<br><br>2018 to current limit<br>With MedLine excluded: | limit 3 to exclude medline<br>journals<br><br>The above syntax limit<br>applied to the combined<br>search removes the<br>MedLine indexed<br>records that are covered<br>by the PubMed Search |
| Medline 1946-current<br>(OVID SP) | 25/01/19 | S1: exp TINNITUS/ or phantom<br>sound*.ab. or ringing.ab. or<br>buzzing.ab. or phantom<br>sound*.ti. or ringing.ti. or<br>buzzing.ti.<br><br>S2: exp COGNITION/ or<br>cogniti*.ab. or memory.ab. or<br>attention*.ab. or executive*.ab. or<br>cogniti*.ti. or memory.ti. or<br>attention*.ti. or executive*.ti. | 14                                                        | Limit publication year:<br>2018 to current                                                                                                                                                   |
| ASSIA (via ProQuest)              | 25/01/19 | (tinnitus OR "phantom<br>sound" OR ringing OR<br>buzzing) AND (cognition<br>OR cogniti* OR memory                                                                                                                                                                                                               | 32                                                        | Limit publication year:<br>02/2018 to current                                                                                                                                                |

|                             |          |                                                                                                                                                                                                                                                                                                                                                |                                                                                     |                                            |
|-----------------------------|----------|------------------------------------------------------------------------------------------------------------------------------------------------------------------------------------------------------------------------------------------------------------------------------------------------------------------------------------------------|-------------------------------------------------------------------------------------|--------------------------------------------|
|                             |          | OR attention* OR executive*)                                                                                                                                                                                                                                                                                                                   |                                                                                     |                                            |
| CINAHL plus (via EBSCOhost) | 25/01/19 | ((MH "Tinnitus") OR tinnitus OR ringing OR phantom sound) AND ((MH "Cognition") OR cognition OR cogniti* OR memory OR attention* OR executive*)                                                                                                                                                                                                | 56                                                                                  | Limit publication year: 2018 to current    |
| Scopus                      | 25/01/19 | ( TITLE-ABS-KEY ( tinnitus ) OR TITLE-ABS-KEY ( ringing ) OR TITLE-ABS-KEY ( buzzing ) OR TITLE-ABS-KEY ( "phantom sound" ) AND TITLE-ABS-KEY ( cognition ) OR TITLE-ABS-KEY ( cogniti* ) OR TITLE-ABS-KEY ( memory ) OR TITLE-ABS-KEY ( attention* ) OR TITLE-ABS-KEY ( executive ) OR TITLE-ABS-KEY ( training ) ) AND NOT INDEX ( medline ) | 108 with not MedLine<br><br>Additional limits:<br>doctype (article or in-press): 79 | Limit publication year: 02/2018 to current |
| Web of Science (SSCI)       | 25/01/19 | (TS=tinnitus OR Ts="ringing" OR Ts="buzzing" OR Ts="phantom sound") AND (TS=cognition OR Ts=cogniti* OR Ts=attention* OR Ts=memory OR Ts=executive*)                                                                                                                                                                                           | 53                                                                                  | Limit publication year: 2018 to current    |
